# Supplementary material for: Hydrothermal Carbonization of Waste Sugarcane Bagasse for the Effective Removal of Emerging Contaminants from Aqueous Solution
Source: Hindawi journal article supplement (doi:10.1155/2022/8684737), 2022-01-01
Supplement: f1 [file 8684737.f1.docx]

**Supplementary Details**

**Table S1.** Different mathematical models used in this work to fit the experimental data

| Kinetic and Isotherm model | Equations | Description | Reference |
| --- | --- | --- | --- |
| Removal Efficiency |  | Qe is the adsorption capacity of ACS with respect to CPF (mg/g), Co and Ce are the initial and equilibrium concentration of CPF (mg L-1) respectively | Prasannamedha et al., 2021 |
| Adsorption Capacity |  | Qe is the adsorption capacity of ACS with respect to CPF (mg/g), Co and Ce are the initial and equilibrium concentration of CPF (mg L-1) respectively, m is the mass of the ACS used experimentally (g) and V is the volume of CPF solution (L) | Prasannamedha et al., 2021 |
| Pseudo first order kinetics |  | k1 is the pseudo-first order kinetic rate constant (min-1) , t is time in mins and qt is amount of SMX adsorbed on the adsorbent at any time t (mg/g) | Lagergren, 1898 |
| Pseudo second order kinetic |  | k2 is the pseudo-second order kinetic rate constant (g mg-1 min-1) and t is time in mins | Ho and Makay, 1999 |
| Intraparticle diffusion model |  | kp is the intraparticle diffusion rate constant (mg g-1 min-1), t is time in mins and C is the intercept reflecting the boundary layer thickness, Di is the intraparticle diffusion coefficient (cm3/s), r the radius of adsorbent particle | Weber and Morris, 1963 |
| Langmuir Isotherm |  | qe is the amount of SMX adsorbed at equilibrium (mg/g), qm is the maximum monolayer adsorption capacity (mg/g), KL is the Langmuir adsorption constant (L/mg) and Ce is the equilibrium concentration of SMX in the solution (mg L-1). | Langmuir, 1918 |
| Langmuir adsorption constant |  | When RL value is between 0 and 1, it indicates favorable adsorption, if RL>1, RL=1, RL=0 it denotes unfavorable, linear, and irreversible adsorption respectively |  |
| Freundlich isotherm |  | KF is the Freundlich constant ((mg/g) (L/mg)1/n), n is Freundlich exponent which is used to measure the intensity of adsorption. If n =1, it is linear whereas when n>1, n<1 it is physical and chemical process respectively | Freundlich, 1906 |
| Temkin Isotherm |  | B = RT/b corresponds to the enthalpy of adsorption, b is Temkin constant related to the heat of adsorption (J/mol), T is the absolute temperature in Kelvin, R is the universal gas constant (8.314 J/mol K), A is binding constant at equilibrium which corresponds to maximum binding energy (L/g) | Temkin and Pyzhev, 1940 |
| Normalized standard deviation (Δqe) |  | qe,experi and qe,cal are the experimental and calculated adsorption capacities respectively and N is the number of data points | Bedin et al 2016 |

**Table S2**

Elemental composition of CS and ACS K

| **Material** | **C (wt%)** | **N (wt%)** | **H (wt%)** | **O (wt%)** | **O/C** | **H/C** | **Yield (%)** |
| --- | --- | --- | --- | --- | --- | --- | --- |
| CS | 62.37 | 0.09 | 2.03 | 35.51 | 0.57 | 0.033 | 64 |
| ACS K | 73.83 | 0.01 | 1.61 | 24.55 | 0.33 | 0.021 | 54.05 |

**Table S3**

EDAX Analysis of CS and ACS K

| **Material** | **Elemental Composition** | **Weight (%)** | **Atoms (%)** |
| --- | --- | --- | --- |
| Carbon Spheres | C | 68.7 | 74.51 |
|  | O | 31.3 | 25.49 |
| Activated Carbon Spheres K | C | 89.30 | 91.75 |
|  | O | 10.70 | 8.25 |

**Table S4**

BET analysis

| **Sample** | **SBET (m2/g)** | **Vt (cm3/g)** | **Vmicro (cm3/g)** | **Vmeso (cm3/g)** |
| --- | --- | --- | --- | --- |
| CS | 11.027 | 0.014 | 0.004 | 0.01 |
| ACS - K | 111 | 1.221 | 0.111 | 1.110 |

**Figures**

**
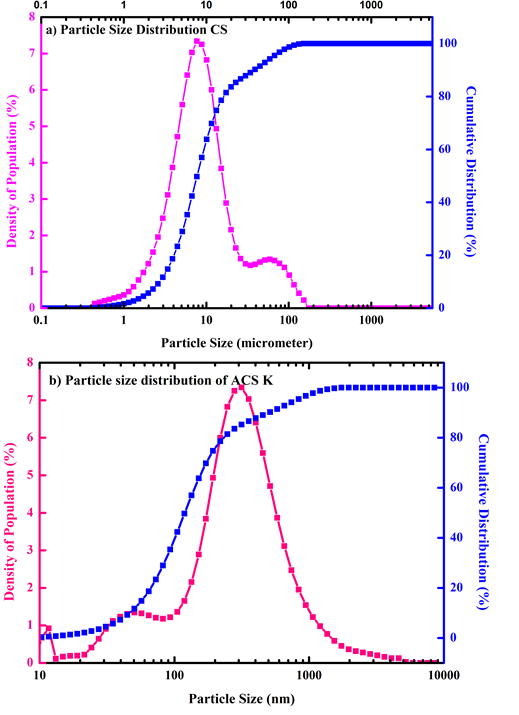
**

**Fig. S1.** Particle Size distribution of CS and ACS. a) denotes Particle size of CS and b) ACS KOH


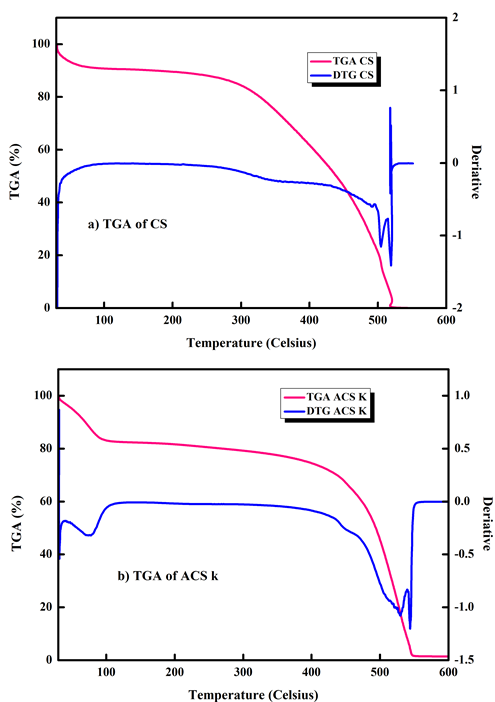


**Fig. S2.** TGA analysis for CS and ACS. a) TGA of CS and b) TGA of ACS KOH


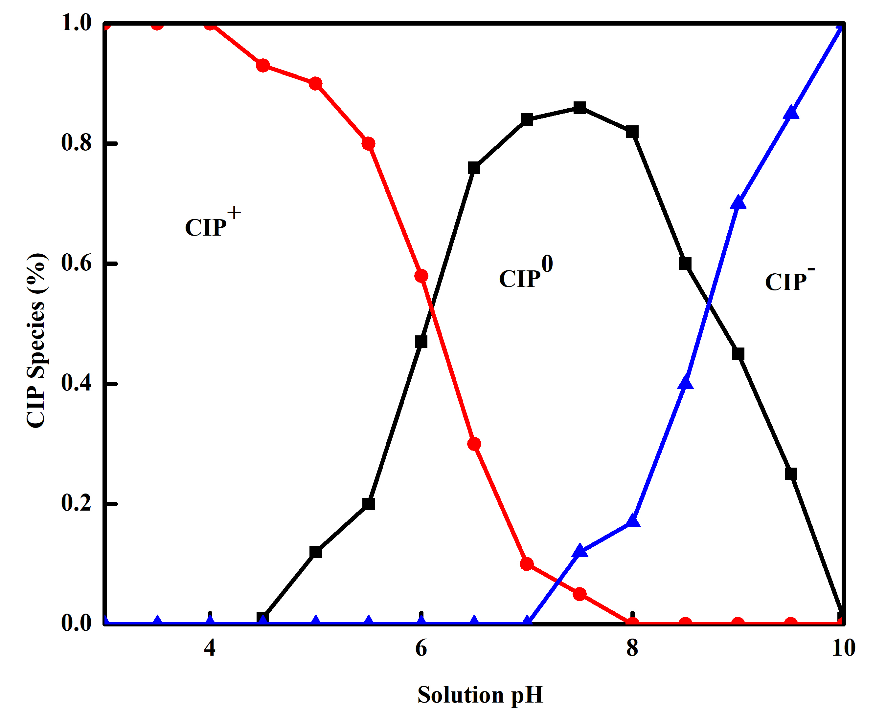


**Fig. S3.** Species distribution of CPF


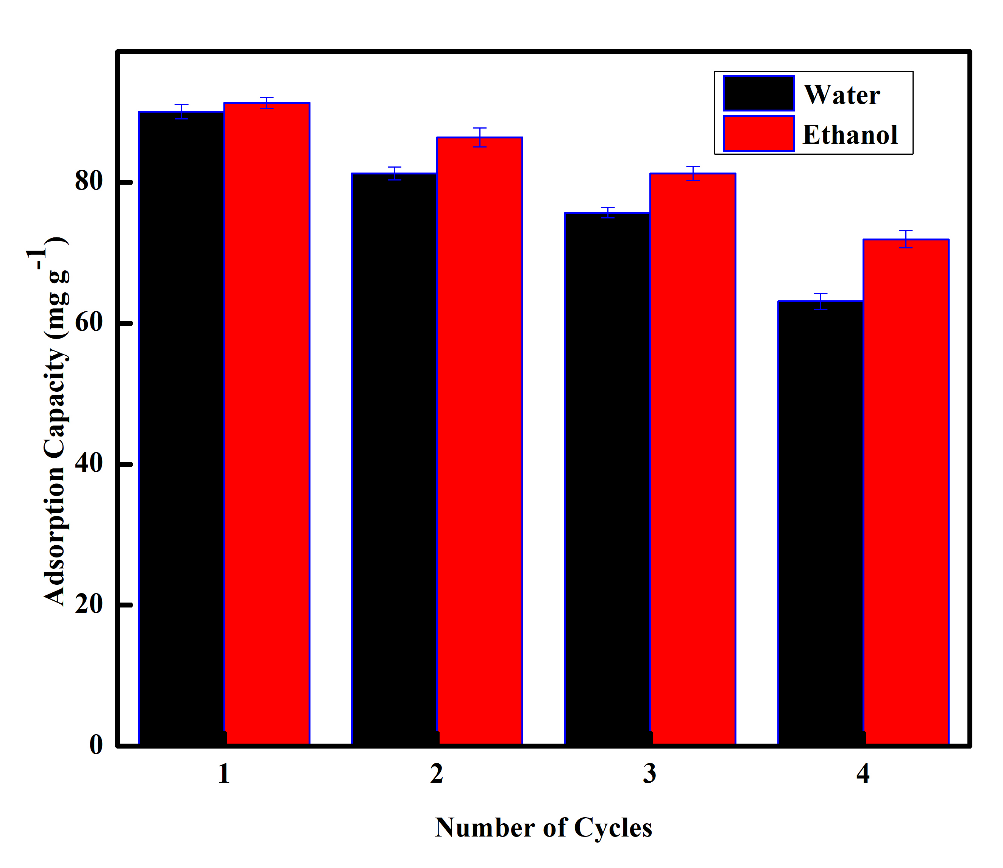


**Fig. S4.** Regeneration of ACS using water and ethanol
